# Supplementary material for: The Effect of Light on Plastid Differentiation, Chlorophyll Biosynthesis, and Essential Oil Composition in Rosemary (Rosmarinus officinalis) Leaves and Cotyledons
Source: PubMed Central journal article supplement (PMC7063033; doi:10.3389/fpls.2020.00196), 2020-03-03
Supplement: Data_Sheet_1.pdf [file Data_Sheet_1.pdf]

## Supplementary Material

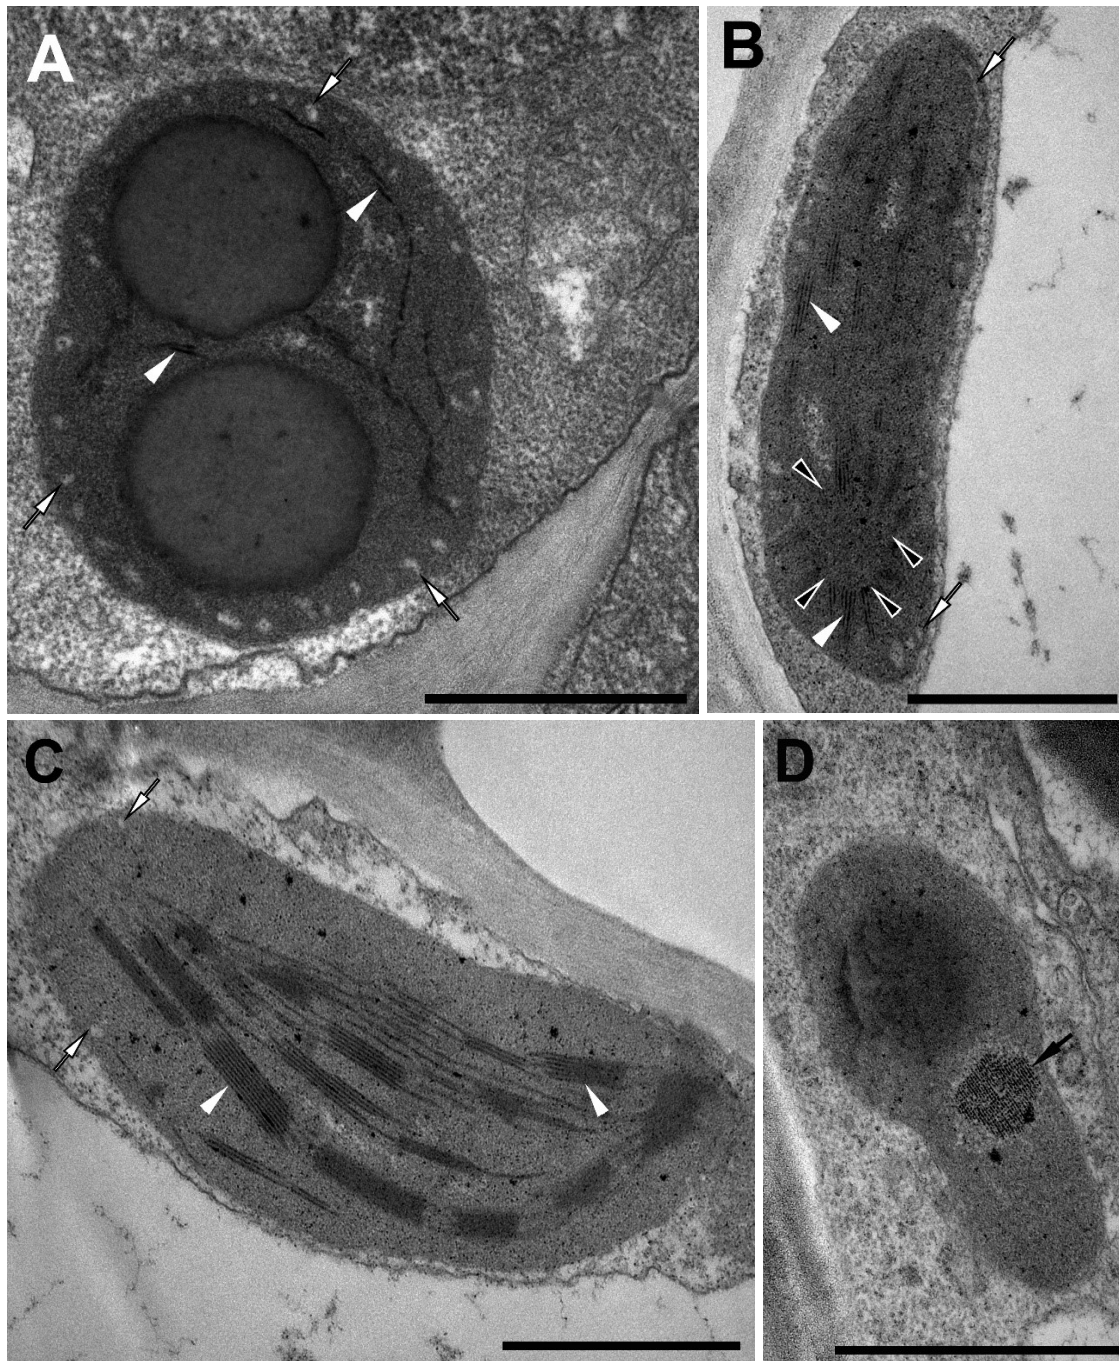

**Supplementary Figure 1. Further details on plastid ultrastructure of dark-forced rosemary (*Rosmarinus officinalis*) shoots developed on adult plants during 2 weeks of growth in complete darkness. (A) Plastid from the adaxial epidermis of first leaf primordium of a dark-forced shoot. (B) Etio-chloroplast from the mesophyll cell of a second leaf of a dark-forced shoot. (C) Chloroplast from the mesophyll cell of the fifth leaf of a dark-forced shoot. (D) Plastid from a phloem parenchyma cell of a second leaf of a dark-forced shoot. White arrowhead: bithylakoids or grana; white arrow: peripheral vesicles or invaginations, black arrowhead: small, hardly distinguishable prolamellar body; black arrow: phytoferritin. Scale bar: 1  $\mu\text{m}$ .**

**Supplementary Table 1. Summarizing the observations on plastid types and ultrastructural features in different cells of rosemary (*Rosmarinus officinalis*) leaves under various conditions.**

|                                                      | Leaf mesophyll cell                                                                           | Epidermis cell                                                                                 | Capitate glandular hair |                                                                             |                                                                 | Peltate glandular hair                                            |                                                                  |           |
|------------------------------------------------------|-----------------------------------------------------------------------------------------------|------------------------------------------------------------------------------------------------|-------------------------|-----------------------------------------------------------------------------|-----------------------------------------------------------------|-------------------------------------------------------------------|------------------------------------------------------------------|-----------|
|                                                      |                                                                                               |                                                                                                | Basal cell              | Stalk cell                                                                  | Head Cell                                                       | Basal cell                                                        | Stalk cell                                                       | Head cell |
| <b>Light-grown samples</b>                           |                                                                                               |                                                                                                |                         |                                                                             |                                                                 |                                                                   |                                                                  |           |
| <b>Young and old leaves of adult plants</b>          | Chloroplast                                                                                   | Chloroplast (electron-dense stroma, thylakoids and grana with inverse contrast, invaginations) | Like in epidermis       | Leucoplast (few single thylakoid-like structures, electron-dense inclusion) | Like in epidermis (with low grana and electron-dense inclusion) | Leucoplast (tubulo-reticular membranes, electron dense inclusion) | Leucoplast (electron-dense stroma, invaginations)                |           |
| <b>Cotyledons of seedlings</b>                       | Chloroplast                                                                                   | Not analyzed                                                                                   |                         |                                                                             |                                                                 |                                                                   |                                                                  |           |
| <b>Dark-forced or dark-germinated samples</b>        |                                                                                               |                                                                                                |                         |                                                                             |                                                                 |                                                                   |                                                                  |           |
| <b>First leaf and shoot tip of dark-forced shoot</b> | Etio-chloroplast (electron-dense stroma, prolamellar body with /bi/thylakoids, invaginations) | Like in light (with invaginations, electron-dense stroma, lower grana)                         | Like in light           |                                                                             | Like in light and in epidermis cells                            | Like in light (more electron-dense stroma, invaginations)         | Like in light (rarely prolamellar body-like structures appeared) |           |
| <b>Second leaf of dark-forced shoot</b>              | Etio-chloroplast (small prolamellar body with grana, invaginations)                           | Not analyzed                                                                                   |                         |                                                                             |                                                                 |                                                                   |                                                                  |           |
| <b>Fifth leaf of dark-forced shoot</b>               | Chloroplast (invaginations)                                                                   | Not analyzed                                                                                   |                         |                                                                             |                                                                 |                                                                   |                                                                  |           |
| <b>Cotyledon of etiolated seedling</b>               | Etioplast (regular prolamellar body)                                                          | Not analyzed                                                                                   |                         |                                                                             |                                                                 |                                                                   |                                                                  |           |
